# Supplementary material for: Serologic Survey of IgG Against SARS-CoV-2 Among Hospital Visitors Without a History of SARS-CoV-2 Infection in Tokyo, 2020–2021
Source: PubMed Central journal article supplement (PMC8761565; doi:10.2188/jea.je20210324), 2022-02-05
Supplement: je-32-105-s001.pdf [file je-32-105-s001.pdf]

**eTable 1.** Population distribution of Tokyo, according to 2020 statistics of resident registration

|                                |       | Male      | Female    | Total      |
|--------------------------------|-------|-----------|-----------|------------|
| Special wards of Tokyo         |       |           |           |            |
| Age, years                     | ≤19   | 732,622   | 701,307   | 1,433,929  |
|                                | 20–39 | 1,378,421 | 1,360,129 | 2,738,550  |
|                                | 40–59 | 1,469,327 | 1,420,432 | 2,889,759  |
|                                | 60–79 | 891,110   | 965,006   | 1,856,116  |
|                                | ≥80   | 227,921   | 424,334   | 652,255    |
| Total                          |       | 4,699,401 | 4,871,208 | 9,570,609  |
| Areas other than special wards |       |           |           |            |
| Age, years                     | ≤19   | 369,408   | 350,251   | 719,659    |
|                                | 20–39 | 502,322   | 477,140   | 979,462    |
|                                | 40–59 | 649,090   | 614,707   | 1,263,797  |
|                                | 60–79 | 459,203   | 508,733   | 967,936    |
|                                | ≥80   | 125,877   | 207,584   | 333,461    |
| Total                          |       | 2,105,900 | 2,158,415 | 4,264,315  |
| Tokyo                          |       |           |           |            |
| Age, years                     | ≤19   | 1,102,030 | 1,051,558 | 2,153,588  |
|                                | 20–39 | 1,880,743 | 1,837,269 | 3,718,012  |
|                                | 40–59 | 2,118,417 | 2,035,139 | 4,153,556  |
|                                | 60–79 | 1,350,313 | 1,473,739 | 2,824,052  |
|                                | ≥80   | 353,798   | 631,918   | 985,716    |
| Total                          |       | 6,805,301 | 7,029,623 | 13,834,924 |

**eTable 2.** The number of study participant and participants positive for anti-SARS-CoV-2 IgG

|                               |       | September 2020 |        | October 2020 |        | November 2020 |        | December 2020 |        | January 2021 |        | February 2021 |        | March 2021 |        |
|-------------------------------|-------|----------------|--------|--------------|--------|---------------|--------|---------------|--------|--------------|--------|---------------|--------|------------|--------|
|                               |       | Positive       | Tested | Positive     | Tested | Positive      | Tested | Positive      | Tested | Positive     | Tested | Positive      | Tested | Positive   | Tested |
| <b>Special wards of Tokyo</b> |       |                |        |              |        |               |        |               |        |              |        |               |        |            |        |
| Male                          |       |                |        |              |        |               |        |               |        |              |        |               |        |            |        |
| Age, years                    | ≤19   | 0              | 7      | 0            | 13     | 0             | 16     | 0             | 11     | 0            | 4      | 0             | 5      | 1          | 11     |
|                               | 20–39 | 2              | 88     | 0            | 115    | 3             | 86     | 2             | 86     | 2            | 70     | 2             | 45     | 3          | 85     |
|                               | 40–59 | 5              | 276    | 4            | 312    | 3             | 291    | 5             | 258    | 6            | 258    | 9             | 192    | 7          | 225    |
|                               | 60–79 | 7              | 616    | 10           | 622    | 14            | 576    | 6             | 514    | 5            | 478    | 9             | 437    | 10         | 479    |
|                               | ≥80   | 1              | 234    | 0            | 252    | 2             | 234    | 1             | 185    | 1            | 175    | 1             | 198    | 5          | 198    |
| Female                        |       |                |        |              |        |               |        |               |        |              |        |               |        |            |        |
| Age, years                    | ≤19   | 0              | 3      | 0            | 13     | 0             | 10     | 0             | 9      | 0            | 6      | 0             | 3      | 0          | 11     |
|                               | 20–39 | 3              | 145    | 4            | 219    | 5             | 158    | 6             | 171    | 5            | 152    | 6             | 116    | 5          | 147    |
|                               | 40–59 | 5              | 292    | 6            | 336    | 3             | 268    | 9             | 269    | 7            | 241    | 8             | 205    | 12         | 236    |
|                               | 60–79 | 7              | 525    | 10           | 517    | 11            | 467    | 11            | 445    | 8            | 387    | 9             | 347    | 15         | 437    |
|                               | ≥80   | 0              | 229    | 3            | 254    | 3             | 231    | 6             | 209    | 4            | 224    | 3             | 193    | 4          | 197    |
| <b>Tama area</b>              |       |                |        |              |        |               |        |               |        |              |        |               |        |            |        |
| Male                          |       |                |        |              |        |               |        |               |        |              |        |               |        |            |        |
| Age, years                    | ≤19   | 0              | 51     | 0            | 50     | 0             | 56     | 0             | 47     | 2            | 50     | 0             | 45     | 9          | 25     |
|                               | 20–39 | 0              | 25     | 0            | 25     | 0             | 21     | 0             | 24     | 0            | 24     | 0             | 22     | 0          | 18     |
|                               | 40–59 | 0              | 105    | 1            | 116    | 0             | 71     | 2             | 70     | 2            | 85     | 3             | 70     | 2          | 71     |
|                               | 60–79 | 2              | 331    | 5            | 338    | 8             | 255    | 5             | 234    | 4            | 242    | 11            | 233    | 1          | 264    |
|                               | ≥80   | 2              | 200    | 3            | 143    | 4             | 126    | 2             | 105    | 1            | 126    | 1             | 112    | 4          | 121    |
| Female                        |       |                |        |              |        |               |        |               |        |              |        |               |        |            |        |
| Age, years                    | ≤19   | 0              | 38     | 0            | 38     | 2             | 36     | 0             | 36     | 0            | 35     | 2             | 28     | 0          | 24     |
|                               | 20–39 | 0              | 59     | 0            | 49     | 0             | 46     | 0             | 39     | 0            | 35     | 0             | 30     | 2          | 45     |
|                               | 40–59 | 2              | 156    | 0            | 164    | 1             | 123    | 1             | 118    | 1            | 110    | 2             | 119    | 4          | 133    |
|                               | 60–79 | 5              | 298    | 2            | 294    | 4             | 258    | 5             | 220    | 4            | 245    | 6             | 209    | 3          | 209    |
|                               | ≥80   | 3              | 159    | 0            | 136    | 0             | 109    | 1             | 102    | 1            | 109    | 1             | 102    | 2          | 98     |

**eTable 3.** Estimated cases of each subgroup based on anti-SARS-CoV-2 IgG seroprevalence

|                                       |              | Estimated cases (95% confidence interval) |                                 |                                  |                                  |                                  |                                    |                                  |
|---------------------------------------|--------------|-------------------------------------------|---------------------------------|----------------------------------|----------------------------------|----------------------------------|------------------------------------|----------------------------------|
|                                       |              | September 2020                            | October 2020                    | November 2020                    | December 2020                    | January 2021                     | February 2021                      | March 2021                       |
| <b>Special wards of Tokyo</b>         |              |                                           |                                 |                                  |                                  |                                  |                                    |                                  |
| <b>Male</b>                           |              |                                           |                                 |                                  |                                  |                                  |                                    |                                  |
| Age, years                            | ≤19          | 0 (0–300,094)                             | 0 (0–180,996)                   | 0 (0–150,852)                    | 0 (0–208,734)                    | 0 (0–441,306)                    | 0 (0–382,300)                      | 66,602 (1,684–302,412)           |
|                                       | 20–39        | 31,328 (3,810–109,856)                    | 0 (0–43,514)                    | 48,084 (9,997–135,879)           | 32,056 (3,899–112,334)           | 39,383 (4,796–137,055)           | 61,263 (7,483–208,821)             | 48,650 (10,116–137,424)          |
|                                       | 40–59        | 26,618 (8,680–61,371)                     | 18,838 (5,148–47,751)           | 15,148 (3,131–43,831)            | 28,475 (9,289–65,597)            | 34,170 (12,609–73,361)           | 68,875 (31,819–128,002)            | 45,712 (18,511–92,637)           |
|                                       | 60–79        | 10,126 (4,082–20,738)                     | 14,327 (6,893–26,169)           | 21,659 (11,897–36,041)           | 10,402 (3,828–22,486)            | 9,321 (3,034–21,601)             | 18,352 (8,429–34,517)              | 18,604 (8,961–33,913)            |
|                                       | ≥80          | 974 (25–5,374)                            | 0 (0–3,312)                     | 1,948 (236–6,959)                | 1,232 (31–6,780)                 | 1,302 (33–7,162)                 | 1,151 (29–6,340)                   | 5,756 (1,880–13,207)             |
|                                       | <b>Total</b> | <b>69,046 (35,634–381,397)</b>            | <b>33,164 (17,587–221,951)</b>  | <b>86,839 (45,690–264,375)</b>   | <b>72,166 (37,444–299,254)</b>   | <b>84,177 (42,918–538,062)</b>   | <b>149,641 (83,572–564,021)</b>    | <b>185,324 (104,409–442,187)</b> |
| <b>Female</b>                         |              |                                           |                                 |                                  |                                  |                                  |                                    |                                  |
| Age, years                            | ≤19          | 0 (0–496,244)                             | 0 (0–173,260)                   | 0 (0–216,351)                    | 0 (0–235,826)                    | 0 (0–322,081)                    | 0 (0–496,244)                      | 0 (0–199,812)                    |
|                                       | 20–39        | 28,141 (5,831–80,617)                     | 24,843 (6,798–62,705)           | 43,042 (14,082–98,341)           | 47,724 (17,659–101,743)          | 44,741 (14,642–102,137)          | 70,352 (26,136–148,505)            | 46,263 (15,145–105,532)          |
|                                       | 40–59        | 24,322 (7,930–56,115)                     | 25,365 (9,348–54,630)           | 15,900 (3,288–45,970)            | 47,524 (21,890–88,862)           | 41,257 (16,699–83,702)           | 55,431 (24,142–107,162)            | 72,225 (37,707–123,770)          |
|                                       | 60–79        | 12,867 (5,189–26,323)                     | 18,665 (8,988–34,048)           | 22,730 (11,402–40,293)           | 23,854 (11,969–42,265)           | 19,948 (8,652–38,913)            | 25,029 (11,510–46,960)             | 33,124 (18,660–54,023)           |
|                                       | ≥80          | 0 (0–6,781)                               | 5,012 (1,036–14,481)            | 5,511 (1,140–15,905)             | 12,182 (4,501–26,069)            | 7,577 (2,073–19,132)             | 6,596 (1,365–18,990)               | 8,616 (2,359–21,713)             |
|                                       | <b>Total</b> | <b>65,330 (36,600–565,579)</b>            | <b>73,885 (47,586–254,537)</b>  | <b>87,184 (53,343–313,428)</b>   | <b>131,283 (89,316–377,805)</b>  | <b>113,524 (72,696–444,168)</b>  | <b>157,408 (101,335–663,052)</b>   | <b>160,228 (111,154–376,336)</b> |
|                                       | <b>All</b>   | <b>134,376 (90,310–724,132)</b>           | <b>107,049 (76,483–368,345)</b> | <b>174,023 (120,745–461,608)</b> | <b>203,449 (148,981–538,624)</b> | <b>197,702 (139,656–759,250)</b> | <b>307,049 (220,392–960,797)</b>   | <b>345,552 (250,919–681,232)</b> |
| <b>Areas other than special wards</b> |              |                                           |                                 |                                  |                                  |                                  |                                    |                                  |
| <b>Male</b>                           |              |                                           |                                 |                                  |                                  |                                  |                                    |                                  |
| Age, years                            | ≤19          | 0 (0–25,776)                              | 0 (0–26,273)                    | 0 (0–23,550)                     | 0 (0–27,885)                     | 14,776 (1,803–50,660)            | 0 (0–29,074)                       | 0 (0–50,677)                     |
|                                       | 20–39        | 0 (0–68,911)                              | 0 (0–68,911)                    | 0 (0–80,923)                     | 0 (0–71,568)                     | 0 (0–71,568)                     | 0 (0–77,545)                       | 55,814 (6,908–174,366)           |
|                                       | 40–59        | 0 (0–22,408)                              | 5,596 (142–30,569)              | 0 (0–32,863)                     | 18,545 (2,258–64,538)            | 15,273 (1,858–53,500)            | 27,818 (5,794–78,007)              | 9,142 (231–49,327)               |
|                                       | 60–79        | 2,775 (336–9,944)                         | 6,793 (2,213–15,697)            | 14,406 (6,263–27,955)            | 9,812 (3,202–22,573)             | 7,590 (2,076–19,184)             | 21,679 (10,929–38,068)             | 6,958 (1,903–17,605)             |
|                                       | ≥80          | 1,259 (153–4,488)                         | 2,641 (547–7,563)               | 3,996 (1,097–9,981)              | 2,398 (291–8,448)                | 999 (25–5,466)                   | 1,124 (28–6,136)                   | 2,081 (253–7,355)                |
|                                       | <b>Total</b> | <b>4,033 (1,356–81,345)</b>               | <b>15,029 (7,606–93,554)</b>    | <b>18,402 (9,759–110,067)</b>    | <b>30,775 (13,052–121,388)</b>   | <b>38,638 (19,155–128,222)</b>   | <b>50,621 (26,089–148,963)</b>     | <b>73,994 (23,993–209,563)</b>   |
| <b>Female</b>                         |              |                                           |                                 |                                  |                                  |                                  |                                    |                                  |
| Age, years                            | ≤19          | 0 (0–32,403)                              | 0 (0–32,403)                    | 19,458 (2,382–65,370)            | 0 (0–34,112)                     | 0 (0–35,036)                     | 25,018 (3,072–82,321)              | 0 (0–49,902)                     |
|                                       | 20–39        | 0 (0–28,919)                              | 0 (0–34,602)                    | 0 (0–36,769)                     | 0 (0–43,062)                     | 0 (0–47,729)                     | 0 (0–55,207)                       | 21,206 (2,590–72,283)            |
|                                       | 40–59        | 7,881 (957–27,996)                        | 0 (0–13,672)                    | 4,998 (127–27,333)               | 5,209 (132–28,469)               | 5,588 (141–30,496)               | 10,331 (1,255–36,510)              | 18,487 (5,074–46,234)            |
|                                       | 60–79        | 8,536 (2,783–19,698)                      | 3,461 (420–12,391)              | 7,887 (2,157–19,952)             | 11,562 (3,775–26,575)            | 8,306 (2,272–20,977)             | 14,605 (5,396–31,254)              | 7,302 (1,511–21,048)             |
|                                       | ≥80          | 3,917 (811–11,240)                        | 0 (0–5,555)                     | 0 (0–6,908)                      | 2,035 (52–11,088)                | 1,904 (48–10,391)                | 2,035 (52–11,088)                  | 4,236 (515–14,901)               |
|                                       | <b>Total</b> | <b>20,333 (10,810–70,023)</b>             | <b>3,461 (420–53,906)</b>       | <b>32,343 (13,684–96,779)</b>    | <b>18,807 (9,301–80,987)</b>     | <b>15,799 (7,461–81,822)</b>     | <b>51,989 (26,440–137,872)</b>     | <b>51,232 (27,277–129,792)</b>   |
|                                       | <b>All</b>   | <b>24,367 (14,475–116,270)</b>            | <b>18,490 (10,468–111,823)</b>  | <b>50,746 (30,182–162,792)</b>   | <b>49,562 (29,468–159,474)</b>   | <b>54,437 (33,244–165,722)</b>   | <b>102,610 (67,191–233,174)</b>    | <b>125,226 (69,783–281,912)</b>  |
| <b>Tokyo</b>                          |              |                                           |                                 |                                  |                                  |                                  |                                    |                                  |
| <b>Male</b>                           |              |                                           |                                 |                                  |                                  |                                  |                                    |                                  |
| Age, years                            | ≤19          | 0 (0–301,199)                             | 0 (0–182,893)                   | 0 (0–152,679)                    | 0 (0–210,589)                    | 14,776 (1,803–457,538)           | 0 (0–383,404)                      | 66,602 (1,684–307,796)           |
|                                       | 20–39        | 31,328 (3,810–135,805)                    | 0 (0–81,500)                    | 48,084 (9,997–167,485)           | 32,056 (3,899–139,603)           | 39,383 (4,796–160,469)           | 61,263 (7,483–227,956)             | 104,464 (42,200–252,570)         |
|                                       | 40–59        | 26,618 (8,680–67,969)                     | 24,433 (9,698–62,639)           | 15,148 (3,131–58,768)            | 47,021 (21,853–106,125)          | 49,443 (24,049–104,190)          | 96,693 (53,586–174,249)            | 54,855 (26,230–116,634)          |
|                                       | 60–79        | 12,901 (6,383–25,708)                     | 21,119 (12,389–35,936)          | 36,065 (23,353–55,824)           | 20,214 (10,982–37,789)           | 16,911 (8,549–33,800)            | 40,031 (25,402–63,051)             | 25,561 (14,674–44,209)           |
|                                       | ≥80          | 2,233 (775–7,691)                         | 2,641 (547–8,574)               | 5,944 (2,578–13,749)             | 3,630 (1,205–11,839)             | 2,301 (702–9,670)                | 2,275 (707–9,489)                  | 7,836 (3,551–16,965)             |
|                                       | <b>Total</b> | <b>73,080 (39,560–394,856)</b>            | <b>48,193 (30,938–252,660)</b>  | <b>105,242 (63,194–305,045)</b>  | <b>102,921 (63,947–347,428)</b>  | <b>122,816 (77,187–585,457)</b>  | <b>200,263 (129,785–626,152)</b>   | <b>259,318 (164,200–549,762)</b> |
| <b>Female</b>                         |              |                                           |                                 |                                  |                                  |                                  |                                    |                                  |
| Age, years                            | ≤19          | 0 (0–497,300)                             | 0 (0–176,264)                   | 19,458 (2,382–240,627)           | 0 (0–238,281)                    | 0 (0–323,981)                    | 25,018 (3,072–524,559)             | 0 (0–205,949)                    |
|                                       | 20–39        | 28,141 (5,831–88,058)                     | 24,843 (6,798–76,135)           | 43,042 (14,082–109,449)          | 47,724 (17,659–116,807)          | 44,741 (14,642–119,389)          | 70,352 (26,136–166,037)            | 67,469 (31,207–145,710)          |
|                                       | 40–59        | 32,203 (14,408–69,825)                    | 25,365 (9,348–57,667)           | 20,898 (7,377–58,355)            | 52,733 (26,601–100,166)          | 46,846 (21,690–96,059)           | 65,763 (33,183–123,739)            | 90,713 (53,680–149,251)          |
|                                       | 60–79        | 21,403 (11,808–38,886)                    | 22,126 (11,982–39,913)          | 30,618 (17,923–51,925)           | 35,416 (21,207–59,173)           | 28,254 (15,447–51,073)           | 39,634 (23,276–67,169)             | 40,726 (24,846–65,441)           |
|                                       | ≥80          | 3,917 (811–13,897)                        | 5,012 (1,036–15,990)            | 5,511 (1,140–17,991)             | 14,217 (6,284–30,794)            | 9,482 (3,673–23,818)             | 8,631 (3,037–23,979)               | 12,852 (5,572–29,742)            |
|                                       | <b>Total</b> | <b>85,663 (55,397–588,374)</b>            | <b>77,345 (50,872–264,909)</b>  | <b>119,527 (80,883–354,768)</b>  | <b>150,090 (107,060–404,333)</b> | <b>129,323 (87,652–466,494)</b>  | <b>209,297 (147,778–722,283)</b>   | <b>211,460 (156,852–441,405)</b> |
|                                       | <b>All</b>   | <b>158,743 (113,580–755,617)</b>          | <b>125,539 (93,938–403,003)</b> | <b>224,769 (167,660–533,411)</b> | <b>253,011 (194,954–605,747)</b> | <b>252,138 (190,345–824,608)</b> | <b>409,659 (316,043–1,076,318)</b> | <b>470,778 (361,100–841,226)</b> |

**A**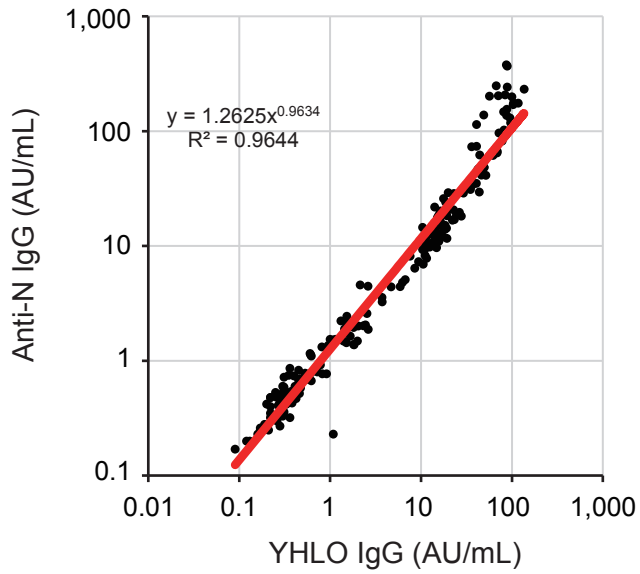**B**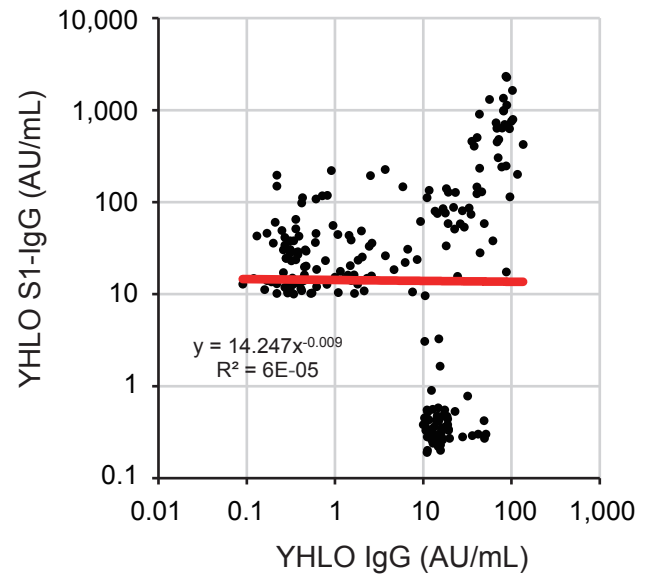

**eFigure 1.** Correlation of YHLO IgG level with anti-N IgG (a) or YHLO S1-IgG (b)  
Correlation of YHLO IgG level with anti-N IgG (a) or YHLO S1-IgG (b). Each dot represents the level of YHLO IgG (x-axis), anti-N IgG (a, y-axis), or YHLO S1-IgG (b, y-axis) for an individual positive for YHLO IgG and/or YHLO S1-IgG. Red lines indicate regression curves. AU, Arbitrary units.

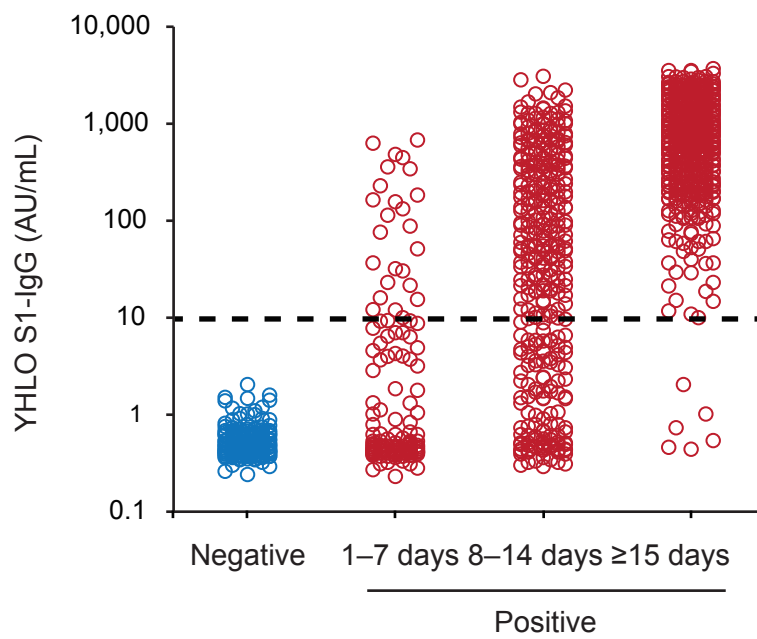

**eFigure 2.** YHLO S1-IgG levels in the PCR-negative and PCR-positive subjects. Each dot represents the level of YHLO S1-IgG in PCR-negative subjects (n=163), PCR-positive subjects 1 to 7 days after symptom onset (n=122), PCR-positive subjects 8 to 14 days after symptom onset (n=340), and PCR-positive subjects  $\geq 15$  days after symptom onset (n=423). Broken line indicates the cutoff value (10 arbitrary units [AU]/mL).
